# Supplementary material
Source: Springer Nature journal article supplement (https://www.springermedizin.de/resource/supplementary/12889_2007_1016_MOESM1_ESM.pdf/9503142)
Supplement: MOESM1 [file 9503142]

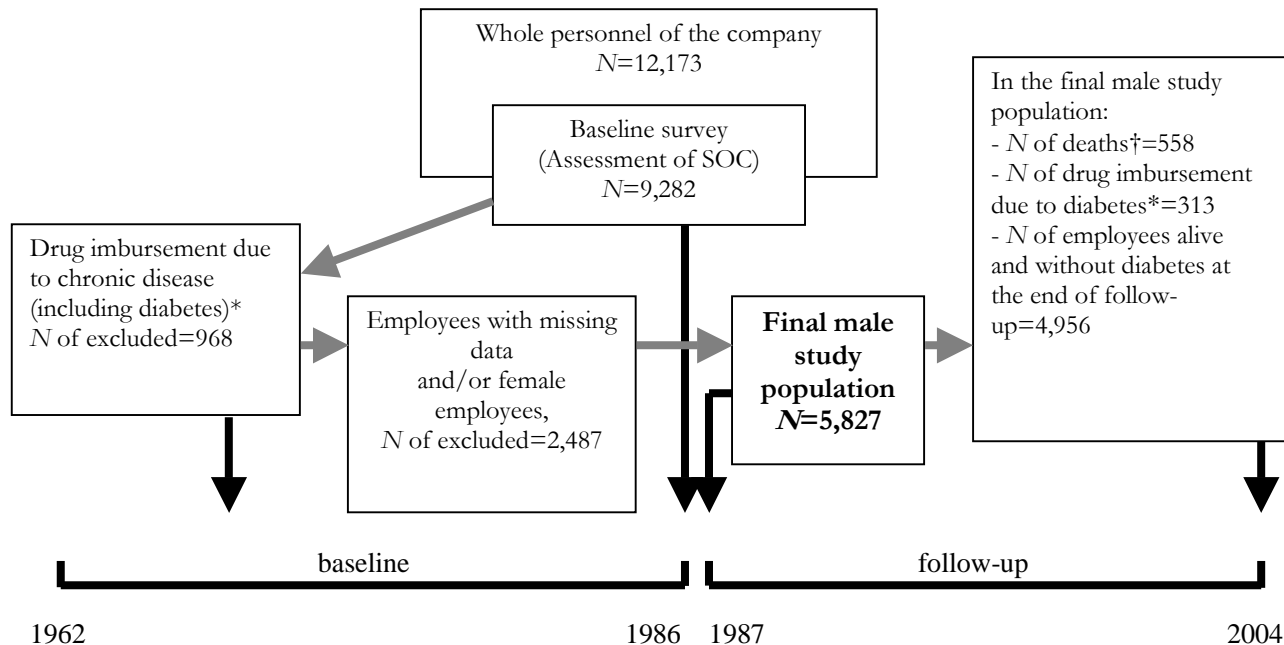

\* Data source: Drug Imbursement Register, Social Insurance Institution, Finland

† Data source: National Death Registry, Statistics Finland
